# Supplementary material for: Identification of vitamin B1 metabolism as a tumor-specific radiosensitizing pathway using a high-throughput colony formation screen
Source: PubMed Central journal article supplement (PMC4467415; doi:10.18632/oncotarget.3468), 2015-02-28
Supplement: oncotarget-06-5978-s001.pdf [file oncotarget-06-5978-s001.pdf]

# Identification of Vitamin B1 metabolism as a tumor-specific radiosensitizing pathway using a high-throughput colony formation screen

## Supplementary Material

### Supplementary Figures S1, S3 and Tables S1-S3

|   | 1        | 2       | 3       | 4       | 5       | 6       | 7       | 8       | 9       | 10      | 11      | 12       |
|---|----------|---------|---------|---------|---------|---------|---------|---------|---------|---------|---------|----------|
| A | PLK      | LIBRARY | LIBRARY | LIBRARY | LIBRARY | LIBRARY | LIBRARY | LIBRARY | LIBRARY | LIBRARY | LIBRARY | DNA-PKcs |
| B | NT       | LIBRARY | LIBRARY | LIBRARY | LIBRARY | LIBRARY | LIBRARY | LIBRARY | LIBRARY | LIBRARY | LIBRARY | UN       |
| C | NT       | LIBRARY | LIBRARY | LIBRARY | LIBRARY | LIBRARY | LIBRARY | LIBRARY | LIBRARY | LIBRARY | LIBRARY | UN       |
| D | NT       | LIBRARY | LIBRARY | LIBRARY | LIBRARY | LIBRARY | LIBRARY | LIBRARY | LIBRARY | LIBRARY | LIBRARY | NT       |
| E | NT       | LIBRARY | LIBRARY | LIBRARY | LIBRARY | LIBRARY | LIBRARY | LIBRARY | LIBRARY | LIBRARY | LIBRARY | NT       |
| F | UN       | LIBRARY | LIBRARY | LIBRARY | LIBRARY | LIBRARY | LIBRARY | LIBRARY | LIBRARY | LIBRARY | LIBRARY | NT       |
| G | UN       | LIBRARY | LIBRARY | LIBRARY | LIBRARY | LIBRARY | LIBRARY | LIBRARY | LIBRARY | LIBRARY | LIBRARY | NT       |
| H | DNA-PKcs | LIBRARY | LIBRARY | LIBRARY | LIBRARY | LIBRARY | LIBRARY | LIBRARY | LIBRARY | LIBRARY | LIBRARY | DNA-PKcs |

**Supplementary Figure S1. siRNA library plate layout.** Controls are located on the edge columns 1 and 12. A total of eight non-targeting (NT), one PLK1 siRNA (transfection control), three DNA-PKcs siRNA (DNA-PKcs; positive radiosensitisation control), and four untransfected (UN) wells are found in columns 1 and 12. Library siRNA are located on columns 2 through 11.

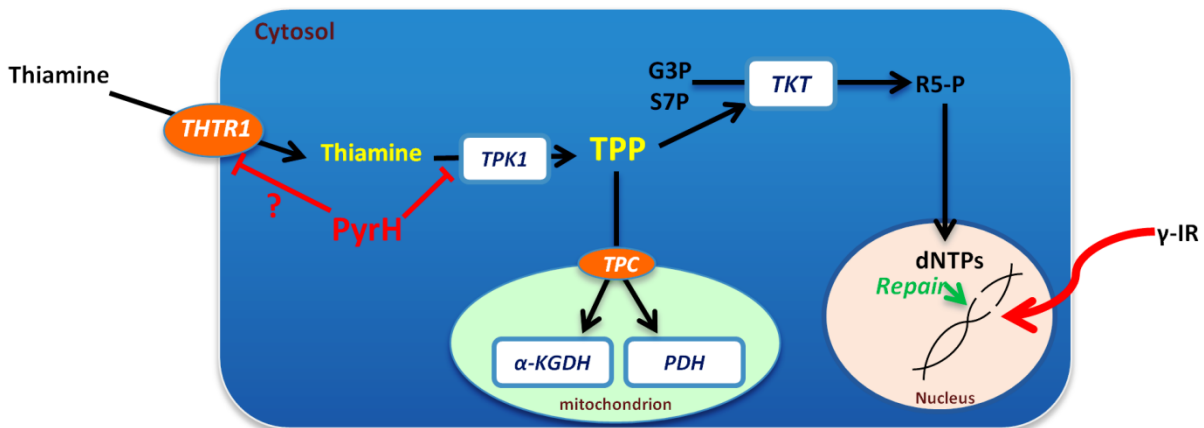

**Supplementary Figure S3. Possible model of radiosensitization by thiamine metabolism**

**inhibition.**

Under normal physiological conditions, thiamine first enters the cell via the THTR1 transporter where it is readily converted into its active form, thiamine pyrophosphate (TPP) by TPK1. TPP is a co-factor for transketolase (TKT), an enzyme in the non-oxidative pentose phosphate pathway (PPP), which catalyzes from glyceraldehyde 3-phosphate (G3P) and sedoheptulose 7-phosphate (S7P) the production of ribose-5 phosphate (R5-P), the sugar phosphate backbone of deoxynucleotide triphosphates (dNTPs). TPP can also be transported into the mitochondria by thiamine pyrophosphate carrier (TPC) and used as a prosthetic group for pyruvate dehydrogenase (PDH) and  $\alpha$ -ketoglutarate dehydrogenase ( $\alpha$ -KGDH).

Thiamine metabolism can be perturbed by THTR1 and TPK1 knockdown, reducing thiamine uptake and production of TPP, respectively. In addition, disruption of thiamine metabolism can be achieved by the thiamine analogue pyrithiamine hydrobromide (PyrH), reducing TPP levels and possibly also thiamine uptake directly. As less TPP is available as a co-factor for TKT, the production of R5-P is decreased. This results in an inhibition of nucleotide production, reducing the cell's capability to repair DNA after irradiation and increasing cell death. The mitochondrial

functions of TPP do not appear to be linked with radiosensitivity as knockdown of the mitochondrial transporter, TPC, did not affect radiosurvival.

**Table S1 Primary high-throughput colony formation assay screen** List of radiosensitivity scores (R-score) for the two primary screen runs of the 709 Dharmacon Kinome ON-TARGET<sub>plus</sub> siRNA library. Genes ordered by rank product analysis using R-score values. Radiosensitizing siRNAs shown by R-scores <0. Abbreviations: Percentage of false prediction (PFP).

| Gene      | Rank Product | PFP      | R-score Run1 | R-score Run2 |
|-----------|--------------|----------|--------------|--------------|
| PRKDC     | 17.54992877  | 0.112    | -2.77248913  | -2.87254     |
| CLK3      | 25.78759392  | 0.195    | -2.04204307  | -2.91376     |
| CHEK1     | 28.4956137   | 0.2375   | -2.486693582 | -2.74961     |
| ATM       | 28.56571371  | 0.230862 | -2.635472343 | -2.43795     |
| CSNK2B    | 30.85449724  | 0.252097 | -2.058988782 | -2.78619     |
| ATR       | 34.05877273  | 0.304688 | -2.372951047 | -2.09122     |
| CKS2      | 34.871119155 | 0.312121 | -1.904632817 | -2.59912     |
| PKMYT1    | 35.4964787   | 0.313971 | -2.012726169 | -2.41409     |
| TAF1      | 36.33180425  | 0.317429 | -1.755511813 | -2.65153     |
| TAF1L     | 41.82104733  | 0.399861 | -1.541934118 | -2.52179     |
| HAK       | 41.98809355  | 0.391351 | -1.799665558 | -2.07109     |
| SMG1      | 42.14261501  | 0.383421 | -1.690170264 | -2.3331      |
| GAK       | 44.72135955  | 0.408974 | -1.869937535 | -1.70943     |
| EPHB2     | 45.57411546  | 0.4105   | -2.266227599 | -1.36282     |
| ACVR2     | 49.74937186  | 0.464268 | -1.738005255 | -1.484       |
| PIK3C2A   | 49.95998399  | 0.457381 | -1.54611734  | -1.75791     |
| SRP72     | 51.75905718  | 0.477907 | -1.702904033 | -1.46401     |
| GCK       | 52.47856705  | 0.478636 | -1.573846592 | -1.49582     |
| TPK1      | 53.24471805  | 0.479222 | -1.391169382 | -1.88296     |
| PCK2      | 54.08326913  | 0.483152 | -1.879877227 | -1.31326     |
| PRKCL2    | 57.91372894  | 0.540106 | -1.170481113 | -2.12681     |
| STK32A    | 58.49786321  | 0.537708 | -1.460019936 | -1.42668     |
| MAP4K3    | 59.14389233  | 0.535714 | -1.389058206 | -1.49693     |
| PFKL      | 59.24525297  | 0.5266   | -1.518674315 | -1.38102     |
| CDC2      | 60.21627687  | 0.532451 | -1.246492279 | -1.74517     |
| MARK3     | 64.93073232  | 0.598077 | -1.361577689 | -1.40574     |
| XYLB      | 66.09084657  | 0.604717 | -1.21539149  | -1.48272     |
| TGFB3     | 66.1135387   | 0.594259 | -1.125924174 | -1.78053     |
| IPMK      | 67.15653356  | 0.599    | -1.827956225 | -0.90456     |
| ACVR2B    | 69.97856815  | 0.628214 | -1.436206058 | -1.18402     |
| PRKCH     | 70.74602462  | 0.629035 | -1.506981303 | -1.07179     |
| MARK2     | 80.42387705  | 0.763017 | -1.092206653 | -1.37926     |
| WNK4      | 83.9761871   | 0.809492 | -0.682898127 | -1.952       |
| DYRK1A    | 84.90583019  | 0.809917 | -1.14002598  | -1.2         |
| TLK1      | 85.97674104  | 0.812049 | -1.172556148 | -1.11406     |
| TRPM7     | 88.65664104  | 0.842339 | -1.399208051 | -0.73944     |
| BRD4      | 91.86402996  | 0.878254 | -1.145784169 | -1.01432     |
| PSKH2     | 92.0597632   | 0.86625  | -1.239067752 | -0.81041     |
| DGKD      | 94.13819629  | 0.887846 | -1.824127273 | -0.39851     |
| PRKCZ     | 95.36770942  | 0.893864 | -0.98857154  | -1.15397     |
| BRAF      | 95.43584232  | 0.881418 | -1.130059723 | -0.99371     |
| CLK4      | 95.66608594  | 0.871985 | -1.144889798 | -0.9501      |
| EFNA3     | 95.74445154  | 0.86058  | -1.036987123 | -1.08134     |
| HUS1      | 96.95875412  | 0.865286 | -1.210794527 | -0.8012      |
| KCNH8     | 97.11848434  | 0.854718 | -0.293824597 | -2.34667     |
| ROCK2     | 98.01785552  | 0.855    | -0.708600341 | -1.41367     |
| PAK7      | 100          | 0.872945 | -1.590901876 | -0.44772     |
| DTYMK     | 101.1978261  | 0.875068 | -1.653210154 | -0.40321     |
| EFNA5     | 103.4891299  | 0.891333 | -0.653920709 | -1.40496     |
| CAMK4     | 103.9230485  | 0.885855 | -1.073825832 | -0.9208      |
| COL4A3BP  | 104.1633333  | 0.877013 | -0.714603325 | -1.33615     |
| TOPK      | 104.2688832  | 0.867244 | -1.327319257 | -0.65417     |
| DGKA      | 104.297651   | 0.856582 | -0.747358426 | -1.31684     |
| CHKA      | 104.4126429  | 0.84775  | -0.801698825 | -1.21771     |
| BRDT      | 105.2330746  | 0.851173 | -0.960186323 | -1.00414     |
| LOC390226 | 106.5833008  | 0.858537 | -0.705824826 | -1.32977     |
| GUCY2C    | 109.5810203  | 0.886566 | -1.224332153 | -0.61018     |
| PACE-1    | 111.0315271  | 0.894167 | -0.840759291 | -1.06674     |
| PRKCQ     | 112.4055159  | 0.900412 | -0.861523967 | -1.06466     |
| PLK3      | 113.8419958  | 0.905988 | -1.197441442 | -0.59751     |
| CDK9      | 115.0217371  | 0.910632 | -0.885447191 | -0.94758     |
| IHPK3     | 116.3829884  | 0.91733  | -0.708600341 | -1.14811     |

|          |             |          |              |          |
|----------|-------------|----------|--------------|----------|
| SNARK    | 117.5755077 | 0.920449 | -0.984683702 | -0.74443 |
| PLK4     | 119.9208072 | 0.940444 | -0.547684887 | -1.32128 |
| VRK3     | 120.218551  | 0.935055 | -1.396835552 | -0.30031 |
| CSNK2A1  | 121.8605761 | 0.946141 | -2.084296665 | 0.201201 |
| CDKN2B   | 122.6784415 | 0.945376 | -1.349782721 | -0.38488 |
| PTK6     | 122.7191917 | 0.935745 | -0.319437898 | -1.4214  |
| ILK      | 126.1427762 | 0.967842 | -0.932968194 | -0.72912 |
| AK3L1    | 127.0826503 | 0.967865 | 0.125261707  | -2.26812 |
| PKM2     | 130.4607221 | 0.994536 | -1.715856746 | 0.00629  |
| SRMS     | 132.7026752 | 1.007653 | -2.349398602 | 0.526766 |
| SPHK2    | 134.3130671 | 1.017071 | -0.469500307 | -1.19564 |
| MAPK7    | 135.7865973 | 1.0237   | 0.148765661  | -1.97574 |
| NTRK1    | 137.5027272 | 1.032079 | -2.012573074 | 0.332392 |
| INSRR    | 141.2515487 | 1.055631 | -0.949894927 | -0.54299 |
| STK35    | 142.1126314 | 1.055673 | -0.719360871 | -0.73735 |
| MAP3K13  | 142.1829807 | 1.046048 | -0.275760788 | -1.26284 |
| DMPK     | 142.821567  | 1.043726 | -0.47745247  | -1.06514 |
| CSF1R    | 142.8845688 | 1.034953 | -0.138974863 | -1.40276 |
| SCAP1    | 144.0138882 | 1.038102 | -0.907636903 | -0.55626 |
| PIK3R3   | 144.1873781 | 1.029495 | -0.255744323 | -1.21907 |
| BRD3     | 146.355731  | 1.043455 | 0.115806812  | -1.57715 |
| AMHR2    | 146.4308711 | 1.03509  | -1.337414807 | -0.13891 |
| PDK3     | 148.7749979 | 1.050357 | -0.396224124 | -1.06627 |
| BTK      | 153.205744  | 1.086681 | -0.765557734 | -0.58534 |
| NEK1     | 154.0649214 | 1.087325 | -1.351887436 | -0.04714 |
| MAPK10   | 156.2561999 | 1.103217 | -0.978450855 | -0.33717 |
| CKM      | 160.3995012 | 1.137284 | -1.390450096 | 0.063312 |
| FRAP1    | 160.9316625 | 1.134017 | -1.102599508 | -0.21066 |
| C9ORF96  | 161.0434724 | 1.125636 | -1.389772306 | 0.051945 |
| PAK6     | 161.4249051 | 1.120756 | -0.524540043 | -0.74295 |
| EFNB3    | 164.1219059 | 1.140542 | -1.026915985 | -0.23919 |
| MAPK13   | 164.2071862 | 1.131901 | -0.1252858   | -1.17978 |
| TNK2     | 164.5357104 | 1.126557 | -1.104596482 | -0.17853 |
| CDKN2D   | 164.6815108 | 1.119024 | -0.447990009 | -0.79834 |
| CDKL2    | 165.3360215 | 1.11621  | -1.042545661 | -0.20594 |
| MAP3K14  | 165.8432995 | 1.11236  | 0.030113805  | -1.32863 |
| PIK3CD   | 166.4992492 | 1.110913 | -0.667775578 | -0.57257 |
| ERBB3    | 167.4096771 | 1.110157 | -0.688714966 | -0.53847 |
| MGC45428 | 168.1963139 | 1.108164 | -1.191000543 | -0.0462  |
| BUB1     | 168.6416319 | 1.104729 | -0.145316259 | -1.07612 |
| CAMK2A   | 168.9260193 | 1.099192 | 0.286083815  | -1.46068 |
| ANKRD3   | 171.0263138 | 1.109542 | -0.868798857 | -0.33348 |
| MARK4    | 171.119841  | 1.102197 | -0.908668716 | -0.28399 |
| MAPKAPK3 | 172.8930305 | 1.112203 | -0.603247459 | -0.60889 |
| ULK2     | 175.0542773 | 1.125373 | -0.685162295 | -0.47613 |
| BMX      | 175.3225599 | 1.118889 | -1.114010212 | -0.09175 |
| CALM2    | 175.7668911 | 1.107883 | -0.254526555 | -0.8069  |
| PRKCSH   | 175.7839583 | 1.099964 | -0.159517077 | -0.99213 |
| NTRK2    | 177.5161964 | 1.11018  | -0.150906432 | -0.99213 |
| VRK1     | 178.2806776 | 1.109071 | -0.802249368 | -0.30853 |
| C9ORF12  | 178.8658715 | 1.107376 | -0.196464401 | -0.93059 |
| MAP2K1   | 179.1926338 | 1.102324 | -1.109845207 | -0.06601 |
| PIK3C2B  | 179.5550055 | 1.097832 | -1.20821034  | 0.066547 |
| RPS6KC1  | 179.6580084 | 1.090903 | -0.001329759 | -1.12204 |
| PIK3R4   | 182.0631758 | 1.103897 | -0.643848791 | -0.46718 |
| CRK7     | 183.3112108 | 1.108014 | 0.270007694  | -1.33762 |
| MAP3K1   | 183.6518445 | 1.104082 | 0.295159052  | -1.34726 |
| SYK      | 184.7593029 | 1.107128 | -0.810873384 | -0.25136 |
| ACVR1B   | 185.1512895 | 1.104094 | -0.204175611 | -0.80186 |
| FLJ10761 | 185.2565788 | 1.097367 | -0.679677628 | -0.40791 |
| COASY    | 187.6166304 | 1.111093 | 1.660130434  | -1.95061 |
| MAP2K7   | 187.6459432 | 1.104145 | -0.207184863 | -0.79469 |
| GALK2    | 189.9894734 | 1.114967 | -0.782114466 | -0.24729 |
| MYO3B    | 191.2328424 | 1.119968 | 1.57698245   | -1.86769 |
| IGF1R    | 192.4993506 | 1.12329  | -0.582491861 | -0.45379 |
| CCRK     | 193.4476673 | 1.117325 | -0.199615139 | -0.75056 |
| GRK4     | 195.9642825 | 1.131329 | -0.493011035 | -0.50785 |
| KSR      | 196.2956953 | 1.126289 | 1.195676873  | -1.53662 |
| AKT1     | 197.4841766 | 1.129156 | -0.325630547 | -0.62261 |
| PRKCD    | 197.90907   | 1.125342 | 0.084512274  | -1.01965 |
| LATS1    | 197.9898987 | 1.119105 | -0.961209364 | -0.03812 |
| CDC42BPA | 198.1035083 | 1.113067 | -0.410852516 | -0.56813 |
| URKL1    | 198.3607824 | 1.102667 | -1.32710416  | 0.37625  |
| EPHA4    | 198.8089535 | 1.099608 | -1.171162572 | 0.235716 |
| PANK4    | 199.7498436 | 1.100958 | -1.463715696 | 0.916178 |
| LMTK3    | 201.1019642 | 1.105387 | -0.238598444 | -0.68035 |
| TNIK     | 201.6184515 | 1.103136 | -0.729688559 | -0.20368 |
| PRKCG    | 201.9108714 | 1.099618 | -0.008047999 | -0.83002 |
| RIPK3    | 202.2325394 | 1.096637 | -0.373606214 | -0.55866 |
| NRBP     | 203.2043307 | 1.097616 | -0.901160059 | -0.07821 |

|             |             |          |              |          |
|-------------|-------------|----------|--------------|----------|
| IKBKG       | 203.5951866 | 1.093873 | -1.396835552 | 0.786809 |
| MLCK        | 204.2302622 | 1.092443 | -0.484224355 | -0.45281 |
| CHEK2       | 207.9975961 | 1.110938 | -0.317958361 | -0.55428 |
| FRK         | 208.0552811 | 1.104915 | -0.166183383 | -0.70213 |
| NME3        | 209.3800373 | 1.107669 | 0.424068988  | -1.21156 |
| SAST        | 209.8928298 | 1.105531 | -1.091637231 | 0.185048 |
| PDK1        | 210.8648856 | 1.100276 | -1.475055661 | 1.626886 |
| ANKK1       | 211.4142852 | 1.098462 | -0.722494313 | -0.14741 |
| PRX         | 212.3864402 | 1.099672 | -0.318869437 | -0.52496 |
| ICK         | 213.6164788 | 1.103071 | -0.004022341 | -0.75233 |
| MAPKAPK5    | 213.8223562 | 1.097892 | -0.881214078 | -0.01563 |
| CDK11       | 213.850415  | 1.092204 | 0.166444669  | -0.97128 |
| CSNK1G1     | 214.368841  | 1.090856 | -0.511527508 | -0.35728 |
| ULK4        | 215.9629598 | 1.096888 | 0.150466152  | -0.93752 |
| FLJ34389    | 216.062491  | 1.091852 | -0.340708309 | -0.4757  |
| STK32B      | 217.3464976 | 1.096211 | 0.085393337  | -0.80448 |
| MUSK        | 219.0091322 | 1.096198 | -0.617496433 | -0.2114  |
| MGC8407     | 219.0616352 | 1.090933 | -0.298855851 | -0.48521 |
| MELK        | 220.027271  | 1.093144 | -0.550006684 | -0.27006 |
| AK2         | 220.0499943 | 1.084987 | -0.081040972 | -0.70052 |
| DLG1        | 220.0499943 | 1.084987 | -0.779144814 | -0.05121 |
| EEF2K       | 221.5581188 | 1.081843 | -0.919948212 | 0.092661 |
| SGK         | 222.6207537 | 1.083794 | -0.916290369 | 0.084422 |
| MAPK9       | 223.6515146 | 1.080647 | -0.167723932 | -0.58096 |
| CDKN1A      | 225.3397435 | 1.087574 | 0.762353282  | -1.21796 |
| RIPK1       | 227.3279569 | 1.094236 | -0.547322314 | -0.22868 |
| RAF1        | 227.4335068 | 1.089583 | 0.21814808   | -0.88349 |
| NLK         | 228.195092  | 1.088927 | -0.64561731  | -0.14227 |
| MYO3A       | 229.3948561 | 1.091748 | -0.674839129 | -0.10637 |
| NME6        | 229.8347232 | 1.089034 | -0.488882394 | -0.26133 |
| PIK3CA      | 230.2976335 | 1.087091 | -1.180734658 | 0.67413  |
| EPHB4       | 232.1637353 | 1.094306 | -0.793677546 | 0.028914 |
| KIAA1811    | 232.383304  | 1.090786 | -1.366473056 | 1.878123 |
| MAPK3       | 232.4930106 | 1.086114 | -0.586402757 | -0.17833 |
| AATK        | 232.6606972 | 1.081745 | 0.082087499  | -0.73257 |
| EIF2AK3     | 232.7337535 | 1.077324 | -0.952178732 | 0.252387 |
| FLJ23356dup | 232.7659769 | 1.0725   | -0.182211652 | -0.52074 |
| ARAF1       | 232.8733561 | 1.068256 | -0.209265408 | -0.4791  |
| NME2        | 234.0512764 | 1.071644 | -0.864356052 | 0.091246 |
| NME5        | 234.499467  | 1.070184 | -1.136433677 | 0.593834 |
| ACVR1C      | 234.9957446 | 1.06789  | -0.076169535 | -0.59678 |
| MARK1       | 235.8134856 | 1.068356 | -0.662665822 | -0.08032 |
| DYRK2       | 237.3646983 | 1.072773 | -0.216945809 | -0.44929 |
| PHKG2       | 237.802439  | 1.070792 | 0.136780625  | -0.74062 |
| HK3         | 237.9957983 | 1.067005 | 0.167854486  | -0.74616 |
| PRKG2       | 238.1554114 | 1.063318 | 0.090202521  | -0.72467 |
| PI4K2B      | 238.6461816 | 1.061518 | -0.082983621 | -0.56337 |
| DGKH        | 238.8660713 | 1.058244 | 0.288416804  | -0.80448 |
| TRIO        | 239.2488244 | 1.054084 | -0.989132914 | 0.377946 |
| RPS6KA3     | 239.2488244 | 1.054084 | -0.624956371 | -0.10521 |
| RIOK1       | 239.7394419 | 1.050241 | -0.500702707 | -0.19077 |
| PRKAB2      | 241.1223756 | 1.055328 | 0.025684768  | -0.64312 |
| MGC4796     | 241.6195356 | 1.053696 | 0.099016654  | -0.71691 |
| CDK10       | 242.1363252 | 1.048384 | 0.089816964  | -0.69082 |
| STK4        | 247.2286391 | 1.076502 | 0.300071958  | -0.79318 |
| CSNK1A1     | 247.4712104 | 1.073355 | -0.06691045  | -0.52737 |
| IHPK2       | 249.3431371 | 1.075339 | 0.057543079  | -0.61264 |
| PRKWINK2    | 251.6525382 | 1.085169 | 0.5143837    | -0.90638 |
| UCK1        | 251.6783662 | 1.080777 | 0.671048675  | -0.97386 |
| GRK1        | 251.7081643 | 1.076444 | 0.132500255  | -0.66972 |
| MYLK2       | 254.0964384 | 1.086479 | -0.608789153 | -0.04109 |
| BLK         | 254.1653005 | 1.08222  | -0.72171976  | 0.118386 |
| CHUK        | 254.3580154 | 1.078967 | 0.355825936  | -0.77181 |
| MGC42105    | 255.4407955 | 1.081543 | -0.45093431  | -0.15933 |
| STK17B      | 256.7761671 | 1.085369 | -0.464645996 | -0.14663 |
| CKS1B       | 256.9163288 | 1.082041 | -0.954217818 | 0.515986 |
| PDK4        | 257.2236381 | 1.079167 | -0.237113905 | -0.29604 |
| MAPK12      | 259.1524648 | 1.085891 | -0.754483208 | 0.224583 |
| BAIAP1      | 259.4937379 | 1.079116 | -0.209680338 | -0.30408 |
| CDKL5       | 260.5225518 | 1.081    | -1.044405147 | 0.783589 |
| MAP3K6      | 261.2470096 | 1.081315 | -0.494997929 | -0.09407 |
| RPS6KB2     | 262.4404694 | 1.083651 | -0.760159802 | 0.258286 |
| PFKM        | 262.9429596 | 1.078287 | -0.918726149 | 0.518836 |
| MAP3K7      | 264.9433902 | 1.08166  | 0.30816664   | -0.72092 |
| LMTK2       | 265.7856279 | 1.077946 | -0.660158478 | 0.093678 |
| ERN1        | 265.879672  | 1.074266 | -0.242476839 | -0.24311 |
| KDR         | 266.9269563 | 1.076288 | 0.232040686  | -0.65558 |
| PRKY        | 267.787229  | 1.077816 | -0.040954552 | -0.43935 |
| MAGI-3      | 269.2805229 | 1.078289 | -0.516703773 | -0.03577 |
| PIM3        | 269.8777501 | 1.078087 | -0.539392186 | -0.00513 |

|          |             |          |              |          |
|----------|-------------|----------|--------------|----------|
| KHK      | 270.5549852 | 1.073891 | 0.06284939   | -0.49712 |
| IRAK1    | 270.6159641 | 1.070187 | -0.396504263 | -0.12553 |
| MAP2K2   | 271.064568  | 1.06461  | -0.41106615  | -0.11766 |
| NEK9     | 273.3623968 | 1.068155 | -0.020897713 | -0.41147 |
| YES1     | 273.7736291 | 1.066397 | -0.061900587 | -0.38345 |
| STK17A   | 273.9653263 | 1.063223 | 0.054610171  | -0.46718 |
| EPHB3    | 274.226184  | 1.06073  | -0.528943859 | 0.01004  |
| FGFR2    | 274.4193871 | 1.057673 | 0.276135029  | -0.62972 |
| CRKL     | 276.1485108 | 1.054317 | -0.614513921 | 0.100651 |
| SLK      | 276.2607464 | 1.051004 | -0.139730914 | -0.2918  |
| MAP3K3   | 279.7731224 | 1.065536 | -0.046923249 | -0.34138 |
| PRKWINK3 | 280.1017672 | 1.063594 | 0.533296412  | -0.73219 |
| ITPKC    | 280.2748651 | 1.06078  | -0.013491718 | -0.37953 |
| INSR     | 280.3408639 | 1.057367 | -0.527184957 | 0.03494  |
| UMP-CMPK | 281.6806703 | 1.060845 | -0.411575754 | -0.04917 |
| DGKI     | 284.1302518 | 1.061899 | -0.071731394 | -0.30343 |
| CAMKK1   | 284.7279403 | 1.061493 | -0.970081333 | 1.098992 |
| MAP2K3   | 284.9385899 | 1.058997 | -0.41574513  | -0.03453 |
| PTK2     | 286.3354676 | 1.063362 | 0.062565594  | -0.41498 |
| MAP3K11  | 286.9146214 | 1.062715 | -0.202532973 | -0.18364 |
| RIOK2    | 288.1527373 | 1.065548 | -0.486245855 | 0.030285 |
| COMMD3   | 288.3747562 | 1.062952 | -0.993069542 | 1.601991 |
| TESK1    | 289.0415195 | 1.063112 | 0.396184566  | -0.6292  |
| FUK      | 289.6515148 | 1.06239  | -0.635441198 | 0.255856 |
| BMPR1A   | 289.843061  | 1.059561 | -0.905353974 | 0.834096 |
| CDK5R2   | 290.9347006 | 1.060976 | 0.030132024  | -0.36374 |
| BRD2     | 292.5064102 | 1.065302 | -0.157001153 | -0.18913 |
| CDKL3    | 292.6174978 | 1.062191 | 0.920944409  | -0.75114 |
| RPS6KA6  | 294.0833215 | 1.0652   | -0.044061829 | -0.27636 |
| ZAK      | 294.3976902 | 1.062807 | -0.823877834 | 0.677243 |
| LOC91461 | 294.4995756 | 1.059967 | 1.170854774  | -0.80153 |
| ETNK1    | 294.7269923 | 1.057442 | -0.629389737 | 0.281479 |
| PDGFRA   | 295.4285023 | 1.057105 | -0.176990087 | -0.15941 |
| IKBKAP   | 295.7566567 | 1.055016 | 0.296252589  | -0.52874 |
| NEK3     | 295.7752525 | 1.051667 | -0.008129919 | -0.2876  |
| ERBB4    | 297.7263845 | 1.054221 | 0.155942888  | -0.44009 |
| TTBK2    | 298.1140721 | 1.052994 | -0.693639117 | 0.402388 |
| MAP2K6   | 299.8132752 | 1.058032 | 0.123274641  | -0.39695 |
| ROCK1    | 299.9733321 | 1.055482 | 0.557746737  | -0.64902 |
| CKMT2    | 301.4249492 | 1.055431 | -0.375224255 | 0.01268  |
| PSKH1    | 302.2267361 | 1.055064 | 0.203173896  | -0.44837 |
| PIM2     | 302.4070105 | 1.052603 | -0.201179765 | -0.12409 |
| TK2      | 308.0178566 | 1.073044 | -0.886831814 | 1.2165   |
| AK1      | 308.6357076 | 1.072642 | 0.04459173   | -0.28308 |
| DAPK1    | 309.2183694 | 1.071755 | 0.030646386  | -0.25613 |
| RIPK2    | 309.6320397 | 1.070016 | -0.457854749 | 0.138174 |
| DLG3     | 310.0104837 | 1.06866  | -0.596867916 | 0.330621 |
| PIK3R1   | 310.3191905 | 1.066553 | 0.399445171  | -0.52671 |
| TNK1     | 310.4979871 | 1.06418  | -0.420502359 | 0.109484 |
| CDKN2C   | 311.2699793 | 1.064367 | 0.022624665  | -0.24526 |
| TRIB1    | 311.3165591 | 1.061262 | 0.449204616  | -0.53504 |
| DUSTYK   | 311.6191586 | 1.059356 | 0.381876301  | -0.51171 |
| KUB3     | 311.9038313 | 1.05737  | -0.270942802 | -0.01088 |
| SIK2     | 312.7618903 | 1.057896 | -0.205243601 | -0.07337 |
| PAK1     | 313.3560275 | 1.05734  | -0.168306275 | -0.10158 |
| PRKACA   | 314.6426545 | 1.060258 | 0.299323184  | -0.44857 |
| CDC2L5   | 314.6982682 | 1.057281 | 0.912719996  | -0.68251 |
| GSG2     | 314.8174074 | 1.054819 | -0.286063174 | 0.008552 |
| MAPK11   | 315.1713819 | 1.053213 | -0.219630741 | -0.03724 |
| CPNE3    | 315.3252289 | 1.050928 | -0.109738774 | -0.13346 |
| CAMK2D   | 317.1435006 | 1.056448 | 0.22792206   | -0.3935  |
| MST1R    | 317.348389  | 1.054033 | 0.010996497  | -0.20375 |
| PMVK     | 317.9308101 | 1.053338 | -0.227149782 | -0.01438 |
| EPHB1    | 318.0172951 | 1.050651 | -0.6281807   | 0.442682 |
| AURKB    | 318.405402  | 1.048997 | -0.005609272 | -0.18795 |
| DCK      | 319.1238004 | 1.049191 | -0.092890473 | -0.1359  |
| LCK      | 319.1394679 | 1.046232 | 0.51784538   | -0.53096 |
| FGFR4    | 319.4119597 | 1.044415 | -0.474500036 | 0.242205 |
| RPS6KB1  | 319.9812495 | 1.043878 | -0.031942636 | -0.17127 |
| PGK1     | 320.1749522 | 1.041599 | -0.649964973 | 0.559006 |
| PRKAR2B  | 320.3185914 | 1.03913  | 0.191892286  | -0.32279 |
| PRKAB1   | 321.6208948 | 1.041416 | -0.379447188 | 0.145563 |
| ITK      | 323.2460363 | 1.044784 | 0.995526225  | -0.66682 |
| NEK6     | 323.4176866 | 1.042557 | -0.304652116 | 0.071711 |
| RPS6KA2  | 323.8981321 | 1.041433 | 0.396174684  | -0.45274 |
| PHKA1    | 323.9614175 | 1.038786 | 0.339087032  | -0.41999 |
| PAK4     | 324.9615362 | 1.039915 | 0.429807847  | -0.46294 |
| PFKFB1   | 325.5272646 | 1.039205 | -0.200093221 | -0.02002 |
| RET      | 326.9418909 | 1.03904  | -0.799721689 | 1.322739 |
| SBK1     | 327.1926038 | 1.037042 | 1.569248809  | -0.73127 |

|           |             |          |              |          |
|-----------|-------------|----------|--------------|----------|
| BCR       | 327.2842801 | 1.034607 | 0.508572061  | -0.49303 |
| MAST3     | 327.7834651 | 1.030656 | -0.31653954  | 0.113417 |
| GTF2H1    | 328.1950639 | 1.029485 | -0.604398063 | 0.509252 |
| STK33     | 328.686781  | 1.02608  | 0.355935569  | -0.41498 |
| PNKP      | 328.9832823 | 1.024489 | 0.054973019  | -0.1923  |
| PRKCA     | 329.1443452 | 1.022383 | -0.360124489 | 0.184229 |
| STK38L    | 329.8029715 | 1.021676 | 1.131107166  | -0.65939 |
| NEK4      | 331.0755201 | 1.022158 | -0.652985019 | 0.675444 |
| IGF2R     | 331.5056561 | 1.021076 | -0.427920475 | 0.26658  |
| CHKB      | 332.2920402 | 1.02106  | -0.415332201 | 0.264622 |
| HIPK2     | 332.9864862 | 1.020989 | -0.641447492 | 0.645261 |
| STK3      | 333.9221466 | 1.019245 | -0.239799226 | 0.070151 |
| RPS6KL1   | 335.2670577 | 1.021841 | 0.28797295   | -0.3175  |
| KIT       | 335.5845646 | 1.020134 | 0.034869519  | -0.15926 |
| IRAK2     | 336.1428268 | 1.018797 | -0.046160438 | -0.10269 |
| CAMKK1dup | 338.0606454 | 1.0236   | -0.218522047 | 0.061394 |
| EPHA6     | 342.9110672 | 1.04008  | -0.387690667 | 0.297023 |
| PRKAA1    | 346.6641026 | 1.049061 | -0.523115203 | 0.550669 |
| PRPS1L1   | 347.9784476 | 1.051372 | -0.459750354 | 0.382674 |
| TRPM6     | 348.3819743 | 1.050526 | 0.36011853   | -0.31597 |
| PRPS2     | 350.0114284 | 1.051296 | 0.296307793  | -0.27532 |
| PRKR      | 351.1125176 | 1.052611 | 0.850600688  | -0.49541 |
| ROS1      | 352.2570084 | 1.054271 | 0.093694133  | -0.14444 |
| LIMK2     | 354.5504195 | 1.053669 | 0.490690578  | -0.37606 |
| MAP3K8    | 355.2801711 | 1.053814 | -0.117859222 | 0.039191 |
| ADCK2     | 355.4166569 | 1.051799 | 0.374960275  | -0.29676 |
| C10ORF89  | 356.2583332 | 1.05209  | -0.093658238 | 0.019878 |
| NPR2      | 357.7708764 | 1.055166 | -0.137023732 | 0.060486 |
| BMPR1B    | 358.6474592 | 1.055944 | 1.570704574  | -0.59448 |
| RFK       | 358.6767347 | 1.053333 | -0.613554134 | 0.923247 |
| PRKCB1    | 359.3744565 | 1.053198 | -0.353268048 | 0.360775 |
| ITPKA     | 359.7999444 | 1.05219  | -0.235426161 | 0.23156  |
| RFP       | 361.0900165 | 1.054621 | -0.604748623 | 0.916345 |
| CDK3      | 361.6490011 | 1.054156 | -0.51857062  | 0.67204  |
| STK31     | 361.7098285 | 1.051809 | 0.102772204  | -0.11934 |
| RELA      | 362.3009798 | 1.051391 | 0.045671659  | -0.07426 |
| PASK      | 364.7437457 | 1.054638 | -0.080388536 | 0.031036 |
| FGR       | 365.4805056 | 1.054851 | 0.474910501  | -0.2987  |
| HUNK      | 365.7512816 | 1.053226 | -0.140926659 | 0.110292 |
| DDR1      | 366.9822884 | 1.054777 | -0.295467696 | 0.341684 |
| MAPK1     | 367.1157856 | 1.052617 | 0.125626882  | -0.10944 |
| PKIB      | 367.4152964 | 1.050998 | -0.198685868 | 0.203939 |
| STK10     | 367.559519  | 1.049066 | -0.05044239  | 0.029675 |
| TBK1      | 367.7662301 | 1.047279 | 0.814317354  | -0.41869 |
| CLK1      | 367.9211872 | 1.045183 | 0.208056508  | -0.15462 |
| SSTKdup   | 369.1747554 | 1.047524 | 0.543415775  | -0.31417 |
| ERK8      | 369.5186058 | 1.046399 | -0.253185702 | 0.31658  |
| AKT3      | 369.6484817 | 1.044126 | 0.452753799  | -0.27788 |
| DGKB      | 370.867901  | 1.045811 | 0.070845055  | -0.04799 |
| MAST2     | 370.9339564 | 1.043527 | 0.980689719  | -0.44956 |
| ERBB2     | 373.1353642 | 1.04853  | -0.167414034 | 0.206599 |
| NAGK      | 374.0427783 | 1.046223 | -0.033642345 | 0.041334 |
| FN3KRP    | 376.4518562 | 1.049308 | -0.219605632 | 0.311214 |
| CAMKK2    | 377.3963434 | 1.049679 | -0.09811781  | 0.138922 |
| FLT4      | 378.153408  | 1.049893 | 0.761539962  | -0.36922 |
| PACSIN1   | 378.4441835 | 1.048294 | 0.031564897  | 0.007446 |
| MAP3K4    | 379.0659573 | 1.047955 | 0.717088411  | -0.31939 |
| EFNA4     | 380.462876  | 1.050425 | 0.820380555  | -0.37725 |
| JAK2      | 382.6238362 | 1.055576 | 0.343364827  | -0.18217 |
| STYK1     | 383.1866386 | 1.054859 | 0.062602898  | 0.003653 |
| MPP1      | 384.4450546 | 1.054019 | -0.032635734 | 0.08937  |
| CDC42BPB  | 384.8129416 | 1.052634 | 0.060521198  | 0.008527 |
| BCKDK     | 384.9363584 | 1.050581 | -0.089973169 | 0.181265 |
| AURKC     | 385.9987047 | 1.051462 | -0.146088339 | 0.25502  |
| CERK      | 386.3159329 | 1.050174 | 0.195198526  | -0.09168 |
| CDK7      | 386.3871116 | 1.047921 | 0.446013558  | -0.20584 |
| PFKFB3    | 387.5732189 | 1.049044 | -0.153193729 | 0.267709 |
| KIAA1765  | 390.1486896 | 1.054966 | -0.492471742 | 1.00208  |
| FLJ23356  | 390.3844259 | 1.053383 | 0.322389828  | -0.14396 |
| GUCY2D    | 391.1725962 | 1.053638 | -0.335721837 | 0.608818 |
| ALS2CR7   | 395.4023268 | 1.059477 | -0.411479643 | 0.779536 |
| DYRK1B    | 396.8626967 | 1.061882 | 0.709890816  | -0.2553  |
| PIP5K1B   | 397.2404813 | 1.060656 | 0.590713077  | -0.22164 |
| SPEG      | 397.3310962 | 1.058352 | 0.310251322  | -0.11996 |
| PFKFB2    | 397.3650714 | 1.056081 | -0.471288469 | 1.018657 |
| LYK5      | 397.67449   | 1.054472 | -0.558693594 | 2.013898 |
| NYD-SP25  | 399.1240409 | 1.057063 | -0.194620417 | 0.365509 |
| SGK2      | 401.1882351 | 1.061063 | -0.404501951 | 0.831766 |
| PINK1     | 402.8721882 | 1.061915 | 0.027488807  | 0.125138 |
| CIB2      | 404.6924758 | 1.062816 | 0.125626882  | 0.026559 |



|           |             |          |              |          |
|-----------|-------------|----------|--------------|----------|
| ITPK1     | 405.5514764 | 1.063418 | 0.67865244   | -0.21187 |
| PRKCN     | 406.5599587 | 1.06404  | 0.209190217  | -0.02426 |
| IKBKE     | 407.8565924 | 1.063736 | 0.425670768  | -0.13602 |
| ADRBK1    | 408.8520515 | 1.064452 | 1.597859846  | -0.4024  |
| TEC       | 409.3910111 | 1.063895 | 0.252501712  | -0.0457  |
| DGKQ      | 409.4874845 | 1.061878 | 0.740173178  | -0.22523 |
| TRIB2     | 409.756025  | 1.060359 | 0.492179949  | -0.15853 |
| DLG2      | 411.8154927 | 1.064326 | -0.074309493 | 0.298094 |
| ALS2CR2   | 414.5370912 | 1.070933 | 1.077419655  | -0.2929  |
| CAMK2B    | 418.4973118 | 1.078359 | 0.956257461  | -0.2499  |
| PIK3CB    | 419.2994157 | 1.078825 | 0.586380069  | -0.15248 |
| CDKL1     | 419.4412951 | 1.076753 | 0.64491793   | -0.16647 |
| DGUOK     | 419.5414163 | 1.074742 | 0.380264517  | -0.08751 |
| EPHA5     | 421.0605657 | 1.073974 | 0.971100315  | -0.24913 |
| KIAA2002  | 421.2837524 | 1.072505 | -0.313966368 | 0.90448  |
| PRPS1     | 421.3241033 | 1.070404 | 0.044086723  | 0.204396 |
| PRKG1     | 421.594592  | 1.068811 | 0.278713841  | -0.012   |
| STK36     | 422.5695209 | 1.069576 | 0.302017749  | -0.0303  |
| DCAMKL1   | 424.1650622 | 1.067747 | -0.057335805 | 0.342599 |
| TSKS      | 424.2640687 | 1.065809 | -0.213369814 | 0.632425 |
| HIPK3     | 424.5291509 | 1.064539 | -0.2714747   | 0.792008 |
| JAK3      | 425.0058823 | 1.064111 | 0.078840659  | 0.191967 |
| FYN       | 427.9158796 | 1.063091 | 0.021036774  | 0.280537 |
| PAK2      | 428.1354926 | 1.061553 | -0.295806204 | 0.936891 |
| DUSP21    | 429.3436852 | 1.060412 | -0.226875158 | 0.713566 |
| FLT1      | 431.4510401 | 1.064588 | -0.005844401 | 0.331644 |
| PRKCM     | 433.0958324 | 1.066561 | 0.08059073   | 0.229689 |
| TGFBR2    | 433.5666039 | 1.065738 | 1.084769588  | -0.23386 |
| RIOK3     | 436.8523778 | 1.070878 | -0.004519031 | 0.350004 |
| STK16     | 437.1978957 | 1.06943  | -0.095307977 | 0.484035 |
| PFTK1     | 439.6817031 | 1.074583 | -0.023644905 | 0.374007 |
| PRKAR1B   | 442.6962841 | 1.080588 | 0.236881515  | 0.07751  |
| PRKACG    | 445.2527372 | 1.083343 | -0.110178928 | 0.592859 |
| STK11     | 447.2940867 | 1.087026 | 0.456317473  | -0.02871 |
| IRAK3     | 447.3969155 | 1.085131 | 0.647609068  | -0.09303 |
| CDK4      | 447.7175449 | 1.083936 | -0.109391797 | 0.60026  |
| GSK3A     | 449.5564481 | 1.086613 | -0.168580349 | 0.766018 |
| STK22Ddup | 453.4754679 | 1.092824 | 0.035429713  | 0.364023 |
| MOS       | 453.667279  | 1.091155 | 0.252099998  | 0.128404 |
| SRC       | 456.335403  | 1.093492 | 0.093383944  | 0.320043 |
| MAP3K15   | 456.683698  | 1.092228 | -0.105876356 | 0.656985 |
| PKLR      | 457.8908167 | 1.092875 | 0.09565242   | 0.324175 |
| CALM3     | 460.5659562 | 1.097761 | -0.296281157 | 2.701992 |
| HSMDPKIN  | 461.0249451 | 1.0969   | -0.109117005 | 0.69049  |
| MAP4K2    | 462.4283728 | 1.098124 | -0.286689684 | 1.991781 |
| MAP2K4    | 462.8174586 | 1.09701  | 0.97481092   | -0.12876 |
| PTK9      | 463.2407581 | 1.095714 | 0.238794403  | 0.195775 |
| GRK6      | 463.6830814 | 1.094609 | 0.03388053   | 0.415141 |
| LTK       | 468.2392551 | 1.101284 | 1.387923971  | -0.17626 |
| PIP5K2C   | 469.7446115 | 1.10266  | 0.015191032  | 0.538954 |
| PDPK1     | 470.6399898 | 1.102946 | 0.071744883  | 0.402228 |
| PRKAR1A   | 471.06369   | 1.101586 | -0.116919359 | 0.84559  |
| DYRK3     | 471.2769886 | 1.100039 | 0.201413081  | 0.27295  |
| PTK7      | 474.5576888 | 1.105925 | 0.662693414  | -0.00575 |
| NEK5      | 475.2567727 | 1.105538 | -0.214811642 | 1.500588 |
| PTK2B     | 475.4702935 | 1.103896 | 0.660901718  | -0.00407 |
| GOLGA5    | 475.6469279 | 1.102232 | 0.996393647  | -0.10276 |
| ROR1      | 477.080706  | 1.103652 | 0.719110344  | -0.01637 |
| PRKCE     | 477.3730198 | 1.102137 | 0.568727282  | 0.022874 |
| HSPB8     | 478.2760709 | 1.102143 | 0.94678738   | -0.08003 |
| DDR2      | 478.3513353 | 1.100323 | 0.87502795   | -0.05551 |
| EPHA2     | 481.1901911 | 1.103011 | 0.091898817  | 0.434098 |
| MAP3K2    | 481.2691555 | 1.101115 | -0.149269337 | 1.125591 |
| GUCY2F    | 481.3408356 | 1.099189 | 0.159083587  | 0.353598 |
| THNSL1    | 483.0900537 | 1.101318 | 0.15697001   | 0.361871 |
| PRKCL1    | 484.3862095 | 1.102688 | 0.559361829  | 0.045921 |
| MAPK6     | 486.1944056 | 1.104296 | 0.337222423  | 0.223903 |
| MAK       | 489.1012165 | 1.109223 | 0.39922925   | 0.184103 |
| PNCK      | 490.1897592 | 1.109953 | 0.025108354  | 0.66463  |
| FER       | 490.2570754 | 1.108032 | 0.209546915  | 0.345197 |
| EPHA3     | 490.6444741 | 1.106946 | 1.203248131  | -0.09898 |
| ADCK1     | 491.4600696 | 1.106877 | 0.11856601   | 0.466737 |
| NRBP2     | 491.8536368 | 1.105603 | 0.132765601  | 0.42971  |
| AXL       | 493.0314392 | 1.10414  | 0.228227531  | 0.341056 |
| JAK1      | 493.5098783 | 1.10322  | 0.337879752  | 0.252673 |
| CASK      | 497.0553289 | 1.107592 | 1.021627801  | -0.0457  |
| CDKL4     | 499.5738184 | 1.111358 | -0.099457084 | 1.193164 |
| LRRK2     | 500.665557  | 1.11196  | 1.724797894  | -0.12024 |
| FASTK     | 501.4578746 | 1.111755 | 0.798551965  | 0.019947 |
| LOC340156 | 502.0906293 | 1.111186 | 0.724572483  | 0.047665 |

|               |             |          |             |          |
|---------------|-------------|----------|-------------|----------|
| FGFR1         | 502.5186564 | 1.110419 | 0.354698921 | 0.266045 |
| TYRO3         | 503.4580419 | 1.110709 | 0.3253729   | 0.306261 |
| RNASEL        | 504.3193433 | 1.11049  | 0.340761751 | 0.29366  |
| CRIM1         | 506.415837  | 1.112935 | 1.319206737 | -0.07046 |
| NEK8          | 507.9192849 | 1.114159 | 0.147863402 | 0.529043 |
| PAPSS1        | 509.0432202 | 1.114422 | 0.952248952 | 0.009699 |
| GALK1         | 510.4762482 | 1.115486 | 0.218697691 | 0.415875 |
| MAPK14        | 510.4870224 | 1.113525 | 1.254724226 | -0.0457  |
| SPHK1         | 511.6277944 | 1.114013 | 0.590423315 | 0.168542 |
| CAMK1G        | 512.3475383 | 1.11388  | 0.691626608 | 0.108074 |
| AAK1          | 512.5553629 | 1.112317 | 0.115376905 | 0.638161 |
| DKFZP761P0423 | 514.8300691 | 1.115241 | 0.215314178 | 0.466285 |
| MAPK4         | 515.7324888 | 1.113221 | 0.003628487 | 0.977701 |
| CSNK1D        | 517.1537489 | 1.11389  | 0.075931966 | 0.737428 |
| KCNH2         | 518.4322521 | 1.114415 | 0.810865207 | 0.071215 |
| MGC4796dup    | 518.8188509 | 1.113221 | 0.543024407 | 0.213831 |
| KIAA1811dup   | 519.4997594 | 1.112862 | 0.342959281 | 0.348739 |
| CALM1         | 521.7470652 | 1.115212 | 0.03765592  | 0.908112 |
| LATS2         | 522.4538257 | 1.112636 | 0.223976163 | 0.519656 |
| MAP4K1        | 523.5647047 | 1.113325 | 0.166628354 | 0.605095 |
| MAP3K5        | 523.8625774 | 1.111909 | 0.331997511 | 0.371855 |
| PDGFRL        | 524.22705   | 1.110769 | 0.695011128 | 0.177264 |
| MVK           | 525.0904684 | 1.110541 | 0.63767482  | 0.2038   |
| RPS6KA4       | 525.1161776 | 1.108641 | 0.141371964 | 0.649214 |
| PIM1          | 526.3078947 | 1.108974 | 0.442629685 | 0.313178 |
| TP53RK        | 526.3952887 | 1.107205 | 1.064331806 | 0.029722 |
| NME4          | 530.6241608 | 1.113839 | 0.116502084 | 0.770001 |
| PRKAR2A       | 530.9237233 | 1.112561 | 0.757984319 | 0.164071 |
| MERTK         | 531.2626469 | 1.111235 | 0.540727767 | 0.264856 |
| LRRK1         | 531.3275826 | 1.109466 | 0.900555601 | 0.093444 |
| CAMK2G        | 535.1448402 | 1.114079 | 0.834973008 | 0.139313 |
| LYN           | 536.1865347 | 1.114167 | 0.25378283  | 0.554431 |
| ABL1          | 539.5164502 | 1.118559 | 0.228126847 | 0.609921 |
| MAP3K9        | 540.2295808 | 1.117877 | 1.327506357 | 0.020904 |
| PFKFB4        | 540.8992512 | 1.117453 | 0.260711234 | 0.573426 |
| PANK2         | 541.6142539 | 1.116945 | 1.405165026 | 0.01574  |
| HIPK4         | 541.8440735 | 1.115434 | 0.357961349 | 0.409165 |
| PAK3          | 542.566125  | 1.114651 | 0.180735855 | 0.707488 |
| BMP2K         | 542.9079112 | 1.113396 | 0.435209217 | 0.366703 |
| MPP3          | 544.9770637 | 1.113037 | 0.292412556 | 0.56919  |
| TYK2          | 545.4310222 | 1.112061 | 0.59147349  | 0.301352 |
| MAP3K10       | 545.5712602 | 1.110481 | 0.690722638 | 0.262544 |
| C14ORF20      | 545.8058263 | 1.109074 | 0.133516031 | 0.85832  |
| ACVR1         | 547.64861   | 1.110538 | 0.03758588  | 1.333458 |
| NRK           | 548.4806286 | 1.110327 | 0.1684207   | 0.785195 |
| ADRBK2        | 550.3580653 | 1.1099   | 0.458359218 | 0.376201 |
| FLJ32685      | 551.1288416 | 1.109282 | 0.520850666 | 0.35187  |
| CDK2          | 551.3710185 | 1.10785  | 0.130565699 | 0.93788  |
| SCYL1         | 551.5541678 | 1.106356 | 0.301825151 | 0.578809 |
| PDIK1L        | 551.8876697 | 1.105033 | 0.256149456 | 0.64472  |
| STK38         | 551.9112247 | 1.103234 | 0.505951507 | 0.361405 |
| CSNK1E        | 554.5151035 | 1.106175 | 0.835124558 | 0.228413 |
| ABL2          | 555.1162041 | 1.105298 | 0.630646763 | 0.330416 |
| HRI           | 555.3458382 | 1.103903 | 0.207791177 | 0.777042 |
| AK7           | 555.5069757 | 1.102471 | 1.246220769 | 0.083857 |
| CSK           | 559.2566495 | 1.107064 | 1.086523607 | 0.149242 |
| EPHA1         | 559.7713819 | 1.106034 | 0.494891963 | 0.383964 |
| PI4KII        | 560.9367166 | 1.106336 | 1.102065791 | 0.154138 |
| BMPR2         | 560.983957  | 1.104583 | 0.786491634 | 0.264626 |
| CARKL         | 561.0632763 | 1.102884 | 1.079720957 | 0.168009 |
| SRPK2         | 561.4730626 | 1.101892 | 0.475364666 | 0.410257 |
| CDADC1        | 566.2225711 | 1.105626 | 0.945147585 | 0.236664 |
| SNF1LK        | 566.5897987 | 1.104318 | 0.357051352 | 0.586248 |
| MINK          | 567.3473363 | 1.102055 | 1.522437487 | 0.074149 |
| DGKK          | 567.5737837 | 1.100654 | 0.09319235  | 1.388293 |
| MAP4K5        | 567.7534676 | 1.099032 | 1.899387601 | 0.047247 |
| MAPKAPK2      | 567.9084433 | 1.097424 | 1.163050265 | 0.17969  |
| CKB           | 568.928818  | 1.097235 | 0.408705262 | 0.558128 |
| STK24         | 569.8420834 | 1.096798 | 1.07758212  | 0.20351  |
| HIPK1         | 570.3051815 | 1.095761 | 0.17062678  | 1.032468 |
| EPHA7         | 570.9308189 | 1.095088 | 0.421533949 | 0.559577 |
| RAGE          | 570.9570912 | 1.093371 | 1.659081271 | 0.072697 |
| PHKB          | 571.6712342 | 1.090764 | 0.379591341 | 0.597827 |
| NME7          | 574.202055  | 1.091111 | 0.44852695  | 0.551326 |
| FGFRL1        | 574.4893385 | 1.088054 | 0.485948644 | 0.515592 |
| VRK2          | 575.0165215 | 1.087125 | 0.709909879 | 0.356621 |
| AK3           | 575.7343137 | 1.08642  | 0.343982277 | 0.6672   |
| PIK4CB        | 578.7521058 | 1.089465 | 0.172551744 | 1.149757 |
| PIP5K3        | 581.3449922 | 1.092264 | 0.229306404 | 0.96571  |
| STK25         | 581.7516652 | 1.091287 | 0.472131857 | 0.565919 |

|              |             |          |             |          |
|--------------|-------------|----------|-------------|----------|
| GK           | 584.6451915 | 1.094459 | 0.829774444 | 0.340807 |
| GRK7         | 584.9418775 | 1.093177 | 1.185777585 | 0.230586 |
| EGFR         | 585.9249099 | 1.092961 | 1.141921442 | 0.249902 |
| AK5          | 586.4588647 | 1.092122 | 1.359455972 | 0.201067 |
| PANK3        | 588.2686461 | 1.093217 | 1.056086474 | 0.270409 |
| KIAA1361     | 592.748682  | 1.096724 | 0.956079371 | 0.330604 |
| FLJ25006     | 594.4072678 | 1.097395 | 0.530370818 | 0.578442 |
| TJP2         | 596.0939523 | 1.098166 | 0.956249073 | 0.339109 |
| RPS6KA5      | 598.980801  | 1.100456 | 0.348065024 | 0.844467 |
| CAMK1        | 599.2119825 | 1.099151 | 1.009687377 | 0.326726 |
| TEX14        | 599.764954  | 1.098428 | 1.065501681 | 0.315568 |
| SGKL         | 599.7666213 | 1.096738 | 0.206777444 | 1.413267 |
| GNE          | 601.5280542 | 1.097481 | 0.914465681 | 0.363806 |
| NEK11        | 601.9792355 | 1.096457 | 0.583559953 | 0.581455 |
| MAST4        | 602.3603573 | 1.095314 | 1.197690777 | 0.292331 |
| PIK3C3       | 602.4997925 | 1.09393  | 0.180735855 | 1.806385 |
| TESK2        | 604.4071475 | 1.095038 | 0.88928409  | 0.382329 |
| UHMK1        | 606.301905  | 1.094247 | 0.672563819 | 0.541275 |
| PDXK         | 606.9332748 | 1.093495 | 0.487966824 | 0.679701 |
| RP6-213H19.1 | 607.7499486 | 1.09283  | 0.335492671 | 1.011667 |
| PGK2         | 608.3568032 | 1.091917 | 1.003822018 | 0.35305  |
| PRKACB       | 609.5244048 | 1.092073 | 0.244505478 | 1.343509 |
| HCK          | 610.0311467 | 1.091073 | 0.321510356 | 1.084048 |
| PAPSS2       | 611.959966  | 1.091765 | 0.619263582 | 0.613459 |
| PRKD2        | 614.0114005 | 1.092831 | 0.363330173 | 0.958906 |
| PRKAG3       | 615.6362562 | 1.09214  | 0.859982929 | 0.440115 |
| DAPK3        | 616.5387255 | 1.091754 | 0.908811293 | 0.425708 |
| SNRK         | 617.9344625 | 1.091467 | 0.701438601 | 0.590023 |
| EPHB6        | 619.7580173 | 1.092332 | 0.845244611 | 0.485926 |
| ACVRL1       | 621.0104669 | 1.09073  | 0.73771257  | 0.573574 |
| CSNK1A1L     | 622.1286041 | 1.090379 | 0.750494753 | 0.572541 |
| DAPK2        | 624.3268375 | 1.091813 | 0.581817908 | 0.711355 |
| MAP3K12      | 624.6471004 | 1.089044 | 0.619204676 | 0.68905  |
| KIAA1804     | 624.9559985 | 1.08787  | 0.995152257 | 0.405022 |
| STK29        | 625.7075994 | 1.087031 | 0.277299039 | 1.729993 |
| NTRK3        | 625.7411605 | 1.08545  | 0.363573509 | 1.09267  |
| PANK1        | 625.9257144 | 1.08405  | 0.906819188 | 0.513474 |
| ITPKB        | 626.348146  | 1.082926 | 0.433660866 | 0.964926 |
| ADK          | 627.3802675 | 1.081144 | 0.550043444 | 0.764797 |
| DGKG         | 629.4886814 | 1.082108 | 0.271420232 | 2.029034 |
| MET          | 631.5623485 | 1.081431 | 0.453440632 | 0.962302 |
| MKNK1        | 631.9018911 | 1.080168 | 1.107195415 | 0.400899 |
| NME1         | 632.2032901 | 1.078981 | 1.513899777 | 0.330621 |
| PDK2         | 633.5897726 | 1.076217 | 0.997770155 | 0.454139 |
| FLT3         | 634.4982269 | 1.075615 | 0.730201451 | 0.664077 |
| ROR2         | 635.3109475 | 1.075029 | 0.665386296 | 0.693962 |
| SSTK         | 636.7456321 | 1.07518  | 0.663440893 | 0.711173 |
| JIK          | 638.0556402 | 1.074957 | 0.412627919 | 1.16323  |
| ALK          | 639.7030561 | 1.075173 | 1.195432243 | 0.403345 |
| MAP4K4       | 640.4998048 | 1.07444  | 0.740986869 | 0.674553 |
| LAK          | 641.6774891 | 1.074175 | 1.249136157 | 0.39934  |
| DLG4         | 642.2810911 | 1.073338 | 0.482523784 | 1.032154 |
| P101-PI3K    | 643.4656168 | 1.071414 | 0.630272007 | 0.818826 |
| CSNK2A2      | 644.2903072 | 1.069259 | 0.624267249 | 0.843856 |
| RPS6KA1      | 646.3497505 | 1.069836 | 0.663253117 | 0.802441 |
| PFKP         | 646.9969088 | 1.069162 | 0.751554194 | 0.69057  |
| PCTK2        | 648.2900585 | 1.069078 | 0.710170251 | 0.753931 |
| FRDA         | 648.3795185 | 1.067741 | 0.802698058 | 0.667843 |
| NEK2         | 651.4982732 | 1.067839 | 0.771905635 | 0.693252 |
| KIAA0999     | 653.4125802 | 1.068406 | 0.460662624 | 1.200273 |
| TGFBR1       | 654.266001  | 1.064747 | 1.120244471 | 0.527348 |
| CDK6         | 656.2895702 | 1.065231 | 1.274314582 | 0.474307 |
| MATK         | 659.1213849 | 1.066232 | 0.533296412 | 1.130824 |
| CAMKIIALPHA  | 659.1813104 | 1.064811 | 1.336068664 | 0.454384 |
| TNNI3K       | 660.9515867 | 1.065056 | 0.846988714 | 0.709687 |
| N4BP2        | 660.9969743 | 1.063584 | 0.797806134 | 0.741527 |
| MAPK8        | 664.6690906 | 1.064395 | 0.559070048 | 1.145797 |
| MAP3K7IP1    | 664.800722  | 1.062986 | 1.320214188 | 0.51628  |
| STK23        | 665.1856884 | 1.061893 | 0.475882387 | 1.385692 |
| ADCK5        | 665.8468292 | 1.061011 | 1.853202121 | 0.390947 |
| PRKCI        | 668.2963415 | 1.060338 | 2.026965652 | 0.398482 |
| IHPK1        | 669.3429614 | 1.060055 | 0.780112705 | 0.843785 |
| MKNK2        | 671.3240648 | 1.058941 | 1.167123638 | 0.600908 |
| EPHA8        | 672.2945783 | 1.058338 | 1.125216835 | 0.615311 |
| TTBK1        | 675.1066582 | 1.056717 | 1.672156438 | 0.455933 |
| PIP5K1A      | 676.2603049 | 1.0564   | 1.752664977 | 0.452865 |
| ADCK4        | 677.5455704 | 1.056153 | 0.70479201  | 1.062502 |
| AKT2         | 678.1799171 | 1.055191 | 0.592591606 | 1.264119 |
| CSNK1G2      | 678.1887643 | 1.053755 | 0.511313    | 1.613837 |
| HK1          | 678.6434999 | 1.052717 | 0.975272182 | 0.717002 |

|              |             |          |             |          |
|--------------|-------------|----------|-------------|----------|
| PCK1         | 679.0655344 | 1.05156  | 0.485107139 | 1.984336 |
| MGC16169     | 680.4983468 | 1.051233 | 0.910428842 | 0.816272 |
| IRAK4        | 682.4031067 | 1.051475 | 0.852298302 | 0.901518 |
| FGFR3        | 682.5423064 | 1.050149 | 0.788145214 | 0.953495 |
| PCTK1        | 683.3681292 | 1.04915  | 1.263271169 | 0.61897  |
| PIP5K2A      | 683.9736837 | 1.048086 | 0.949806094 | 0.814616 |
| PIK3C2G      | 685.9271098 | 1.048499 | 1.276833443 | 0.62847  |
| OSR1         | 691.4998192 | 1.045842 | 0.955825008 | 0.870394 |
| HK2          | 692.3763428 | 1.04502  | 0.610189547 | 1.676041 |
| SRPK1        | 694.7387998 | 1.044115 | 1.232663596 | 0.689858 |
| CDK8         | 695.2021289 | 1.042952 | 0.776703271 | 1.107697 |
| GRK5         | 696.5881136 | 1.039828 | 0.648641537 | 1.540502 |
| CAMK1D       | 696.9648485 | 1.038598 | 1.172001795 | 0.718934 |
| CDKN1C       | 697.3922856 | 1.037556 | 0.639026677 | 1.679109 |
| CDK5         | 698.5470636 | 1.037124 | 2.102085568 | 0.564987 |
| PIP5KL1      | 700.5883242 | 1.037181 | 0.644090077 | 1.752233 |
| TAO1         | 710.1711061 | 1.039678 | 1.322100685 | 0.726653 |
| PCTK3        | 713.4619822 | 1.040223 | 0.90046128  | 1.189024 |
| PIP5K2B      | 714.0420156 | 1.039202 | 0.905030593 | 1.185893 |
| ADP-GK       | 716.8612139 | 1.038238 | 1.362544739 | 0.779177 |
| NUCKS        | 719.6394931 | 1.038644 | 0.731494548 | 2.048695 |
| DYRK4        | 721.0055478 | 1.038151 | 0.760322549 | 1.741993 |
| LIMK1        | 722.2565334 | 1.03736  | 0.73771257  | 2.25354  |
| ERN2         | 725.2406497 | 1.038234 | 2.196426696 | 0.678647 |
| MAP2K5       | 726.7165885 | 1.036658 | 1.676329306 | 0.717252 |
| PDGFRB       | 728.381768  | 1.036391 | 0.757704504 | 3.060716 |
| PRKAG2       | 731.108747  | 1.032439 | 1.717923602 | 0.749949 |
| STK39        | 731.1908096 | 1.031144 | 0.782058023 | 2.134393 |
| PLK2         | 731.9603814 | 1.030257 | 0.927840186 | 1.392219 |
| RBK5         | 735.2744386 | 1.027903 | 2.281916268 | 0.717252 |
| STK32C       | 737.1254981 | 1.026135 | 1.036132523 | 1.244021 |
| RYK          | 739.2685574 | 1.024644 | 1.079113091 | 1.211031 |
| MPP2         | 741.5787214 | 1.024485 | 1.064956569 | 1.281195 |
| CSNK1G3      | 742.8694367 | 1.023718 | 0.986681014 | 1.459818 |
| DKFZP434C131 | 743.0679646 | 1.022497 | 0.890669628 | 2.365611 |
| TLK2         | 743.7129823 | 1.021506 | 2.166787659 | 0.805973 |
| IKBKB        | 749.2736483 | 1.019956 | 1.480275865 | 0.991849 |
| PKIA         | 750.29994   | 1.019144 | 1.834046919 | 0.903786 |
| PHKA2        | 751.1923855 | 1.018239 | 1.401201922 | 1.055739 |
| CDC7         | 755.3224477 | 1.018555 | 1.531166952 | 1.023233 |
| PHKG1        | 756.4522457 | 1.01793  | 1.237575376 | 1.274557 |
| TEK          | 757.0046235 | 1.015594 | 0.9940632   | 2.13164  |
| PIK3CG       | 757.4707915 | 1.014413 | 1.637323374 | 1.005111 |
| C7ORF2       | 760.0171051 | 1.014095 | 1.777014856 | 0.976668 |
| UMPK         | 761.9291306 | 1.013248 | 1.567216865 | 1.080691 |
| ASK          | 767.9583322 | 1.012799 | 1.316304191 | 1.353234 |
| FLJ23074     | 768.3814157 | 1.011727 | 1.476266829 | 1.196717 |
| PIP5K1C      | 769.9350622 | 1.010868 | 1.452395717 | 1.229444 |
| PKN3         | 771.499838  | 1.010062 | 1.381790576 | 1.333983 |
| ARK5         | 772.8984409 | 1.009121 | 1.682485408 | 1.139877 |
| KSR2         | 775.7157985 | 1.008677 | 1.278749266 | 1.682164 |
| ZAP70        | 778.8632743 | 1.007004 | 1.835840963 | 1.168529 |
| NEK7         | 780.4921524 | 1.006182 | 1.48371359  | 1.35524  |
| PXK          | 783.4960115 | 1.004533 | 1.457817471 | 1.478215 |
| STK22C       | 786.326904  | 1.003798 | 1.677679072 | 1.328342 |
| FN3K         | 790.838163  | 1.002105 | 1.418911155 | 1.935526 |
| FLJ13052     | 792.3673391 | 1.001247 | 1.749874964 | 1.381724 |
| MULK         | 792.4645102 | 1.000049 | 1.500078469 | 1.737182 |
| CLK2         | 811.969827  | 1.000927 | 2.222881931 | 1.812384 |
| CDK5R1       | 820.4998477 | 1        | 2.249091726 | 3.204973 |

**Table S2 Intra-assay variability.** Mean un-normalized surviving fraction (SF) for non-targeting siRNA (siNT) following 7 Gy irradiation and corresponding coefficients of variation (CV) across the primary and secondary screen library plates are shown. CV calculated by dividing the standard deviation of siNT SF<sub>7Gy</sub> by the mean siNT SF<sub>7Gy</sub>.

| Screen           | Screen Run | Library Plate | Mean siNT SF after 7 Gy | % CV   |
|------------------|------------|---------------|-------------------------|--------|
| Primary Screen   | 1          | 1             | 0.065                   | 19.81% |
|                  |            | 2             | 0.074                   | 16.62% |
|                  |            | 3             | 0.070                   | 33.54% |
|                  |            | 4             | 0.078                   | 15.78% |
|                  |            | 5             | 0.073                   | 19.29% |
|                  |            | 6             | 0.070                   | 22.70% |
|                  |            | 7             | 0.083                   | 30.87% |
|                  |            | 8             | 0.100                   | 33.77% |
|                  |            | 9             | 0.084                   | 15.07% |
|                  | 2          | 1             | 0.079                   | 13.65% |
|                  |            | 2             | 0.079                   | 8.98%  |
|                  |            | 3             | 0.098                   | 14.33% |
|                  |            | 4             | 0.089                   | 20.64% |
|                  |            | 5             | 0.092                   | 15.73% |
|                  |            | 6             | 0.092                   | 18.35% |
|                  |            | 7             | 0.101                   | 14.59% |
|                  |            | 8             | 0.093                   | 15.51% |
|                  |            | 9             | 0.092                   | 16.16% |
| Secondary Screen | 1          | 1             | 0.092                   | 12.29% |
|                  | 2          | 1             | 0.080                   | 8.02%  |

**Table S3 Secondary colony formation assay screen** Top 76 genes chosen based on rank product from primary screen were re-run twice in 96-well plate colony formation assay using Dharmacon siGENOME siRNA. Rank product scores were calculated based on R-score. Radiosensitizing siRNAs shown by R-scores <0. Abbreviations: Percentage of false prediction (PFP).

| Gene     | Rank Product | PFP      | R-score Run1 | R-score Run2 |
|----------|--------------|----------|--------------|--------------|
| ATM      | 3.301927     | 0.015    | -7.43373     | -7.3684      |
| PRKDC    | 5.313293     | 0.04     | -6.13342     | -5.77834     |
| CDC2     | 7.113787     | 0.110833 | -5.17802     | -6.64324     |
| TAF1     | 7.883735     | 0.124286 | -5.75644     | -4.45539     |
| MARK2    | 7.958114     | 0.109375 | -5.61649     | -5.62891     |
| CLK3     | 10.39117     | 0.25     | -5.78792     | -4.06633     |
| GAK      | 11.47759     | 0.2985   | -5.5476      | -4.22583     |
| MULK     | 11.88784     | 0.310909 | -5.07646     | -4.30879     |
| MAP4K3   | 12.14636     | 0.299167 | -4.97033     | -4.95304     |
| PIK3C2A  | 13.27614     | 0.353846 | -5.37506     | -4.29703     |
| XYLB     | 15.13217     | 0.476786 | -4.58231     | -4.32119     |
| PRKCL2   | 15.62678     | 0.483    | -4.13955     | -3.99355     |
| DGKD     | 16.6803      | 0.53     | -4.86016     | -3.76176     |
| TLK1     | 17.83177     | 0.582941 | -4.78866     | -4.11414     |
| FLJ13052 | 18.29155     | 0.587778 | -2.70328     | -4.62765     |
| GCK      | 19.42134     | 0.655789 | -5.10971     | -3.66074     |
| TAF1L    | 20.65811     | 0.70975  | -4.66111     | -4.09631     |
| EPHB2    | 22.64743     | 0.828095 | -4.30628     | -3.62874     |
| BRAF     | 24.9353      | 0.956364 | -4.19997     | -2.04878     |
| PKM2     | 27.15593     | 1.086957 | -3.41142     | -3.91335     |
| SRMS     | 27.30518     | 1.052708 | -3.68874     | -2.96704     |
| TPK1     | 28.09492     | 1.0724   | -5.2426      | -1.68947     |
| DTYMK    | 28.67371     | 1.074615 | -2.66619     | -3.32043     |
| SRP72    | 28.95991     | 1.054444 | -4.27162     | -2.22763     |
| GUCY2C   | 30.80769     | 1.124643 | -3.00206     | -1.62136     |
| ROCK2    | 30.9684      | 1.096897 | -3.22927     | -3.80346     |
| GSK3B    | 31.33932     | 1.088333 | -4.60453     | -2.94799     |
| CSNK2B   | 31.96807     | 1.089355 | -2.41152     | -3.73965     |
| SMG1     | 33.65805     | 1.15625  | -3.50315     | -2.48566     |
| IHPK3    | 33.68451     | 1.12303  | -2.75491     | -2.04861     |
| DYRK1A   | 33.70917     | 1.091176 | -3.74989     | -1.80467     |
| TOPK     | 34.48834     | 1.100571 | -4.13955     | -1.87718     |
| CSF1R    | 35.84605     | 1.1375   | -2.08907     | -2.81433     |
| ACVR2B   | 38.05831     | 1.221081 | -5.01352     | -0.10764     |
| IPMK     | 38.21302     | 1.1975   | -1.54822     | -2.49463     |
| CLK4     | 38.27865     | 1.168718 | -2.94173     | -1.72851     |
| CSNK2A1  | 39.83473     | 1.204875 | -2.53106     | -1.26796     |
| CAMK4    | 40.62195     | 1.214146 | -1.60862     | -1.28517     |
| PLK4     | 42.19224     | 1.25     | -2.96735     | -0.85416     |
| NTRK1    | 43.52801     | 1.271628 | -1.50445     | -1.17824     |
| COL4A3BP | 44.42832     | 1.249222 | -1.68497     | -2.73072     |
| AK3L1    | 44.74756     | 1.232174 | -4.15339     | -0.94117     |
| PRKCH    | 46.01638     | 1.255851 | -2.57579     | -1.74323     |
| PTK6     | 47.62203     | 1.28875  | -1.96441     | -1.31368     |
| PSKH2    | 48.14798     | 1.28102  | -1.77198     | -1.74998     |
| EXOSC10  | 48.72342     | 1.2763   | -1.80249     | -1.11097     |
| PFKL     | 49.10459     | 1.261275 | -0.95252     | -1.34857     |
| VRK3     | 49.52075     | 1.248654 | -2.52551     | -1.29567     |
| HUS1     | 49.6103      | 1.227736 | -2.82138     | -1.25323     |
| PLK3     | 50.53088     | 1.23     | -1.22563     | -2.31428     |
| TRPM7    | 51.13051     | 1.224818 | -1.90366     | -0.56925     |
| BRD3     | 51.16937     | 1.204286 | -0.78051     | -1.8718      |
| BRDT     | 52.44029     | 1.214912 | -1.66772     | -0.86293     |
| BRD4     | 52.50688     | 1.195776 | -0.4954      | -1.28761     |
| MYLK     | 57.29609     | 1.282373 | -2.2162      | 0.840643     |
| PRKAA2   | 58.93971     | 1.298333 | -1.83883     | -0.46761     |
| PKMYT1   | 59.2856      | 1.281475 | -1.65985     | -0.64197     |
| ACVR2    | 60.70863     | 1.283468 | -3.31506     | -0.06882     |
| HAK      | 61.15218     | 1.270794 | -1.59182     | -1.23295     |
| TGFBR3   | 62.18329     | 1.27     | -0.95823     | -0.34569     |
| CHKA     | 62.69797     | 1.258923 | -2.81349     | 2.867491     |
| EFNA3    | 63.46891     | 1.233731 | -0.71686     | -0.34815     |

|               |          |          |          |          |
|---------------|----------|----------|----------|----------|
| <b>CDKN2B</b> | 64.96361 | 1.235294 | -1.03714 | -0.40168 |
| <b>STK22C</b> | 66.21418 | 1.232246 | -1.40855 | -0.46255 |
| <b>CLK2</b>   | 67.29343 | 1.229286 | -1.59182 | -0.27177 |
| <b>FES</b>    | 68.07072 | 1.220141 | -1.1039  | 0.055213 |
| <b>CDK5R1</b> | 69.6939  | 1.205    | -1.44101 | -0.02328 |
| <b>CKS2</b>   | 70.0136  | 1.192568 | -0.48181 | -1.01794 |
| <b>KCNH8</b>  | 72.88617 | 1.185395 | 1.107199 | 0.04329  |
| <b>PRKCQ</b>  | 76.75958 | 1.164051 | -0.87558 | 2.649254 |
| <b>EFNA5</b>  | 77.95263 | 1.141728 | 0.061556 | 0.788593 |
| <b>WNK4</b>   | 78.38697 | 1.130488 | -1.19197 | 4.447382 |
| <b>MARK3</b>  | 79.89016 | 1.110476 | 0.772705 | -0.05686 |
| <b>PCK2</b>   | 81.74664 | 1.103647 | 1.042937 | -0.30339 |
| <b>PRKCZ</b>  | 85.16917 | 1.072955 | 1.324428 | -0.16389 |
| <b>PAK7</b>   | 85.32425 | 1.061124 | 0.289948 | 0.535149 |
| <b>MAPK7</b>  | 88.66168 | 1.030652 | 1.200119 | 1.046589 |
| <b>DGKA</b>   | 91.97439 | 1.021075 | 3.00651  | 1.515868 |
| <b>STK32A</b> | 92.31759 | 1.010213 | 3.272219 | 2.846899 |
| <b>PACE-1</b> | 93.30321 | 0.999737 | 3.320649 | 2.339296 |
